# Supplementary material for: Investigation on kinetic processes of zeolitic imidazolate framework-8 film growth and adsorption of chlorohydro-carbons using a quartz crystal microbalance
Source: Royal Society of Chemistry journal article supplement (doi:10.1039/c5ay02188j), 2015-01-01
Supplement: c5ay02188j1.pdf [file c5ay02188j1.pdf]

**Investigation on kinetic processes of zeolitic imidazolate framework-8  
film growth and adsorption to chlorohydrocarbons by a quartz  
crystal microbalance**

Dazhong Shen\*, Xiaolong Ma, Tingting Cai, Xilei Zhu, Xiaodong Xin, Qi Kang

## Supporting Information

### Molecular simulation calculation the size of chlorohydrocarbons

Dichloromethane (DCM)

boiling points : 39.8°C

molecular weight: 84.93

relative density: 1.3266 (20°C)

vapor pressure: 30.55kPa (10°C)

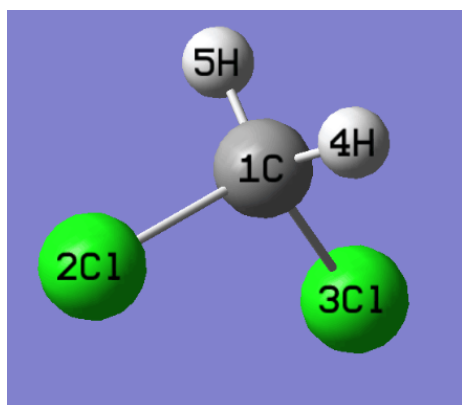

bond length (nm)

1C-4H 0.1069, 1C-5H 0.1069

1C-2Cl 0.183, 1C-3Cl 0.183

bond angle (deg.)

$\angle 4\text{H}-1\text{C}-5\text{H}$  113.259,  $\angle 4\text{H}-1\text{C}-2\text{Cl}$  107.875

$\angle 4\text{H}-1\text{C}-3\text{Cl}$  107.875,  $\angle 5\text{H}-1\text{C}-2\text{Cl}$  107.875

$\angle 5\text{H}-1\text{C}-3\text{Cl}$  107.875,  $\angle 2\text{Cl}-1\text{C}-3\text{Cl}$  112.161

Fig.S1-1 Molecular structure parameters of DCM from molecular simulation calculation

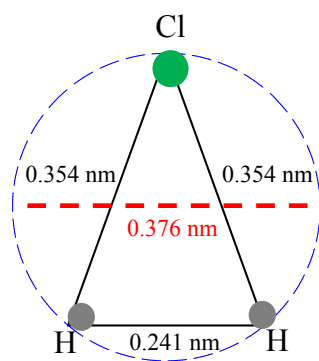

Fig.S1-2 Minimum triangle ( $\Delta\text{HHCl}$ ) in the tetrahedral structure of DCM with a kinetic diameter of 0.376 nm.

Trichloromethane (TCM)

boiling points : 61.3 °C

molecular weight: 119.39

relative density: 1.50 (20°C)

vapor pressure: 13.33kPa (10°C)

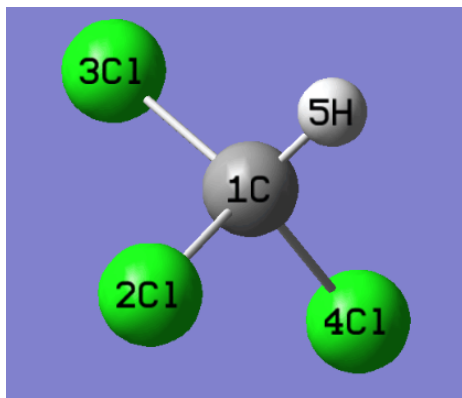

bond length (nm)

1C-5H 0.1067, 1C-2Cl 0.1821

1C-3Cl 0.1821, 1C-4Cl 0.1819

bond angle (deg.)

$\angle 4\text{Cl}-1\text{C}-5\text{H}$  107.935,  $\angle 4\text{Cl}-1\text{C}-2\text{Cl}$  111.152

$\angle 4\text{Cl}-1\text{C}-3\text{Cl}$  111.152,  $\angle 5\text{H}-1\text{C}-2\text{Cl}$  107.704

$\angle 5\text{H}-1\text{C}-3\text{Cl}$  107.704,  $\angle 2\text{Cl}-1\text{C}-3\text{Cl}$  111.017

Fig.S2-1 Molecular structure parameters of TCM from molecular simulation calculation

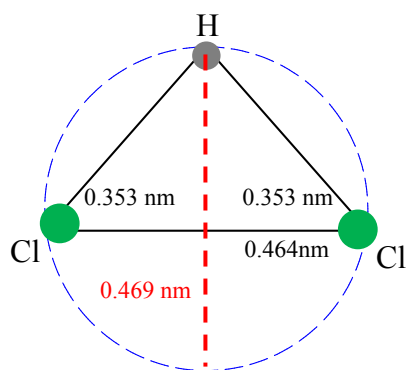

Fig.S2-2 Minimum triangle ( $\Delta\text{HClCl}$ ) in the tetrahedral structure of TCM with a kinetic diameter of 0.469 nm.

Carbon tetrachloride (CTC)

boiling points : 76.8 °C

molecular weight: 153.84

relative density: 1.595 (20°C)

vapor pressure: 15.26 (25°C)

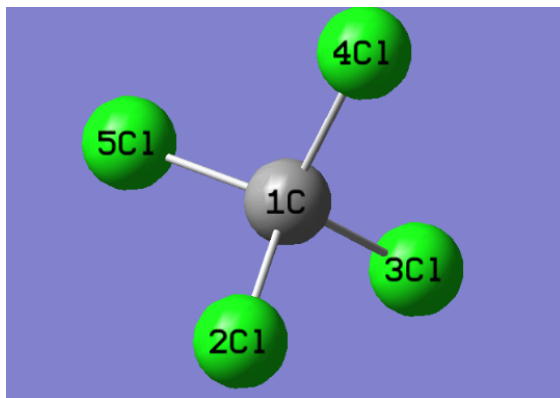

bond length (nm)

1C-2Cl 0.1822, 1C-3Cl 0.1822

1C-4Cl 0.1822, 1C-5Cl 0.1822

bond angle (deg.)

all the bond angle are 109.524

Fig.S3-1 Molecular structure parameters of CTC from molecular simulation calculation

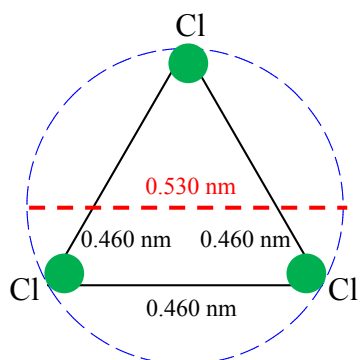

Fig.S3-2 Minimum triangle ( $\Delta\text{ClClCl}$ ) in the tetrahedral structure of CTC with a kinetic diameter of 0.530 nm.
